# Supplementary material
Source: PubMed Central journal article supplement (PMC516495)
Supplement: pnas_101_35_12916__5.pdf [file pnas_101_35_12916__5.pdf]

## FROM

|    |       |                               |                           |                               |                                |                              |                              |
|----|-------|-------------------------------|---------------------------|-------------------------------|--------------------------------|------------------------------|------------------------------|
| TO | Preg  | 1876 2902<br>2221<br>404 1076 | 65 490<br>1373<br>590 349 | 4920 6700<br>1045<br>798 656  | 11196 3358<br>1551<br>1307 891 | 10040 1777<br>677<br>957 691 |                              |
|    | Pinvr | 0 4307<br>2267<br>722 2964    | 0 825<br>180<br>205 50    | 9495 370<br>5117<br>2720 1369 | 0 1420<br>1010<br>221 158      |                              | 1408 2148<br>557<br>853 614  |
|    | Pinvl | 0 1741<br>1925<br>1162 1346   | 0 767<br>2636<br>159 524  | 0 0<br>4955<br>1530 0         |                                | 0 408<br>98<br>470 799       | 804 1677<br>274<br>871 710   |
|    | Aregr | 12083 1188<br>1144<br>532 358 | 0 1390<br>654<br>263 407  |                               | 0 0<br>0<br>672 220            | 45 2938<br>979<br>2881 2987  | 225 800<br>984<br>386 901    |
|    | Aregl | 1543 820<br>1758<br>998 1204  |                           | 0 17165<br>40<br>0 1073       | 0 2916<br>4352<br>1094 2254    | 0 290<br>0<br>0 100          | 0 1826<br>1422<br>1200 1308  |
|    | Ainv  |                               | 95 466<br>489<br>408 486  | 1597 1230<br>1035<br>632 755  | 358 3829<br>246<br>1912 1660   | 0 1870<br>511<br>818 1541    | 1922 1147<br>871<br>1708 653 |
|    |       | Ainv                          | Aregl                     | Aregr                         | Pinvl                          | Pinvr                        | Preg                         |
