# Supplementary material
Source: PubMed Central journal article supplement (PMC516495)

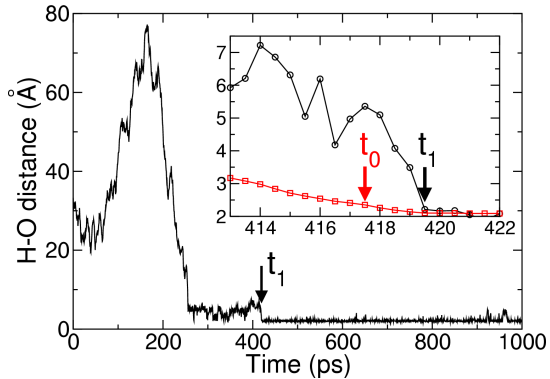

Supplement: pnas_101_35_12916__2.pdf [file pnas_101_35_12916__2.pdf]

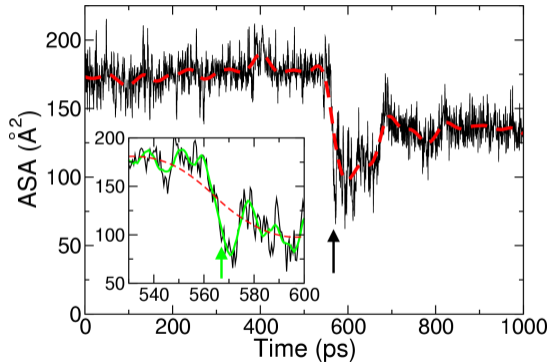

Supplement: pnas_101_35_12916__3.pdf [file pnas_101_35_12916__3.pdf]

**a**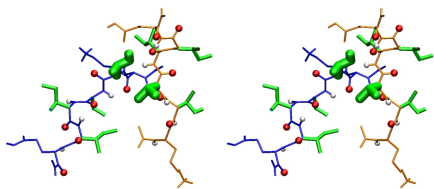**b**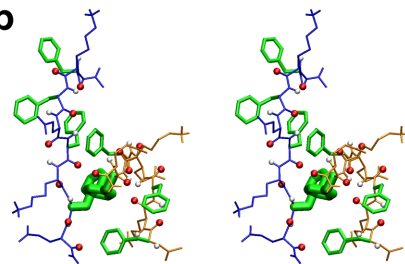**c**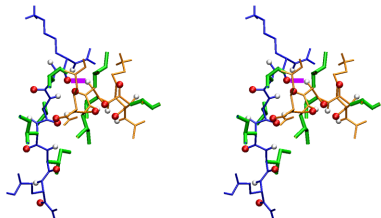**d**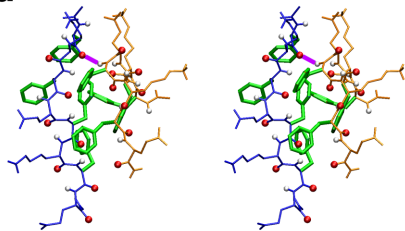**e**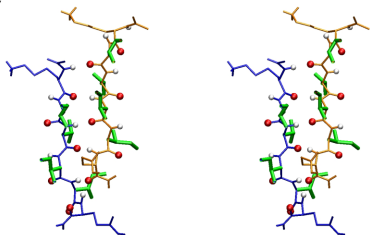**f**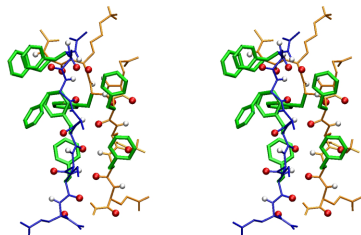

Supplement: pnas_101_35_12916__4.pdf [file pnas_101_35_12916__4.pdf]

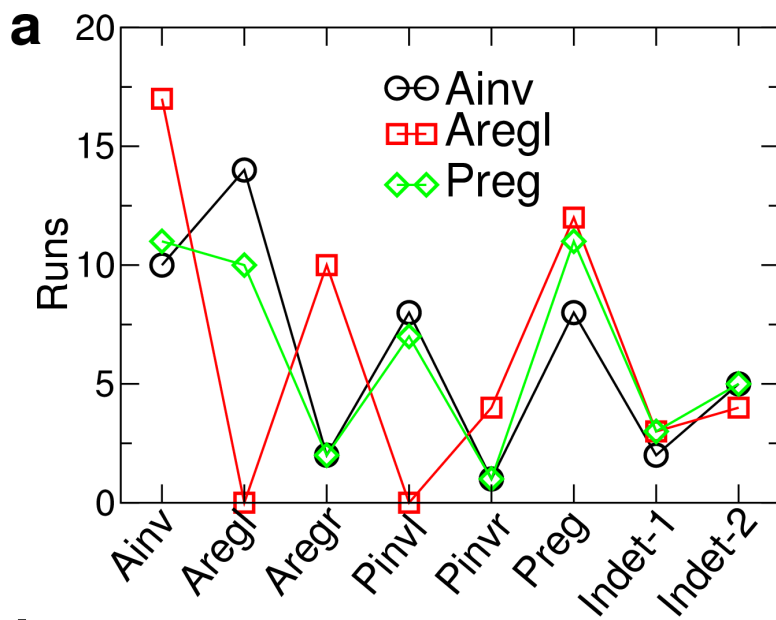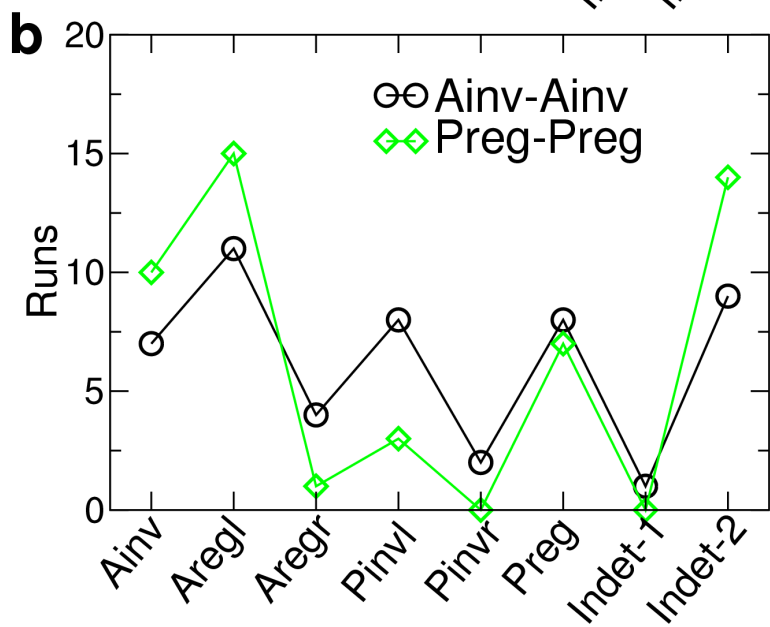

Supplement: pnas_101_35_12916__7.pdf [file pnas_101_35_12916__7.pdf]
